# Supplementary material for: Oncogenic LMO3 Collaborates with HEN2 to Enhance Neuroblastoma Cell Growth through Transactivation of Mash1
Source: PubMed Central journal article supplement (PMC3088666; doi:10.1371/journal.pone.0019297), 2011-05-05
Supplement: pone.0019297.s004.pdf [file pone.0019297.s004.pdf]

Table S1. Correlation between expression of *LMO3* or *Mash1* and other prognostic factors (Student's t-test).

| Factor                         | No. | <i>LMO3</i> expression |                 | <i>Mash1</i> expression |                 |
|--------------------------------|-----|------------------------|-----------------|-------------------------|-----------------|
|                                |     | Mean $\pm$ SEM         | <i>p</i> -value | Mean $\pm$ SEM          | <i>p</i> -value |
| <b>Age</b>                     |     |                        |                 |                         |                 |
| <1 year                        | 41  | 0.76 $\pm$ 0.16        | 0.036           | 5.16 $\pm$ 1.09         | 0.810           |
| $\geq$ 1 year                  | 59  | 1.51 $\pm$ 0.31        |                 | 4.75 $\pm$ 1.28         |                 |
| <b>Tumor stage</b>             |     |                        |                 |                         |                 |
| 1, 2, 4s                       | 44  | 0.91 $\pm$ 0.23        | 0.174           | 2.32 $\pm$ 0.60         | 0.004           |
| 3, 4                           | 56  | 1.43 $\pm$ 0.30        |                 | 6.96 $\pm$ 1.44         |                 |
| <b><i>TrkA</i> expression</b>  |     |                        |                 |                         |                 |
| Low                            | 45  | 1.93 $\pm$ 0.40        | 0.003           | 5.70 $\pm$ 1.71         | 0.398           |
| High                           | 53  | 0.60 $\pm$ 0.09        |                 | 4.11 $\pm$ 0.76         |                 |
| <b><i>MYCN</i> copy number</b> |     |                        |                 |                         |                 |
| Amplified                      | 17  | 2.51 $\pm$ 0.69        | 0.040           | 10.47 $\pm$ 3.94        | 0.112           |
| Single                         | 83  | 0.93 $\pm$ 0.18        |                 | 3.78 $\pm$ 0.64         |                 |
| <b>Tumor origin</b>            |     |                        |                 |                         |                 |
| Adrenal                        | 53  | 1.51 $\pm$ 0.33        | 0.083           | 5.96 $\pm$ 1.46         | 0.196           |
| Others                         | 47  | 0.84 $\pm$ 0.19        |                 | 3.75 $\pm$ 0.86         |                 |
| <b>Shimada classification</b>  |     |                        |                 |                         |                 |
| Favorable                      | 61  | 0.92 $\pm$ 0.18        | 0.082           | 4.36 $\pm$ 0.85         | 0.450           |
| Unfavorable                    | 27  | 2.01 $\pm$ 0.58        |                 | 6.40 $\pm$ 2.54         |                 |
