# Supplementary material for: Oncogenic LMO3 Collaborates with HEN2 to Enhance Neuroblastoma Cell Growth through Transactivation of Mash1
Source: PubMed Central journal article supplement (PMC3088666; doi:10.1371/journal.pone.0019297), 2011-05-05
Supplement: pone.0019297.s005.pdf [file pone.0019297.s005.pdf]

**Table S2.** Univariate and multivariate analyses of *Mash1* and *LMO3* mRNA expression as well as other prognostic factors in primary neuroblastomas

| Factor                                 | n         | p-value   | H.R. | C.I.        |
|----------------------------------------|-----------|-----------|------|-------------|
| Age ( $\geq 1$ year vs. $< 1$ year)    | 59 vs. 41 | 0.011     | 3.2  | (1.3, 9.5)  |
| Stage (1, 2, 4s vs. 3, 4)              | 44 vs. 56 | $< 0.001$ | 7.3  | (2.5, 30.9) |
| <i>MYCN</i> (amplified vs. single)     | 17 vs. 83 | $< 0.001$ | 9.7  | (4.3, 21.9) |
| Origin (non-adrenal vs. adrenal)       | 47 vs. 53 | 0.002     | 3.9  | (1.6, 10.6) |
| <i>Mash1</i> expression (high vs. low) | 30 vs. 70 | 0.048     | 2.2  | (1.0, 4.8)  |
| <i>LMO3</i> expression (high vs. low)  | 26 vs. 74 | 0.012     | 2.9  | (1.3, 6.6)  |
| Age ( $\geq 1$ year vs. $< 1$ year)    | 59 vs. 41 | 0.006     | 3.5  | (1.4, 10.5) |
| <i>Mash1</i> expression (high vs. low) | 30 vs. 70 | 0.024     | 2.5  | (1.1, 5.5)  |
| Stage (1, 2, 4s vs. 3, 4)              | 44 vs. 56 | $< 0.001$ | 6.7  | (2.2, 29.1) |
| <i>Mash1</i> expression (high vs. low) | 30 vs. 70 | 0.559     | 1.3  | (0.6, 2.8)  |
| <i>MYCN</i> (amplified vs. single)     | 17 vs. 83 | $< 0.001$ | 9.7  | (4.2, 22.3) |
| <i>Mash1</i> expression (high vs. low) | 30 vs. 70 | 0.093     | 2.0  | (0.9, 4.4)  |
| Origin (non-adrenal vs. adrenal)       | 47 vs. 53 | 0.002     | 3.8  | (1.6, 10.3) |
| <i>Mash1</i> expression (high vs. low) | 30 vs. 70 | 0.064     | 2.1  | (1.0, 4.6)  |
| Age ( $\geq 1$ year vs. $< 1$ year)    | 59 vs. 41 | 0.014     | 3.0  | (1.2, 9.1)  |
| <i>LMO3</i> expression (high vs. low)  | 26 vs. 74 | 0.015     | 2.9  | (1.2, 6.5)  |
| Stage (1, 2, 4s vs. 3, 4)              | 44 vs. 56 | $< 0.001$ | 7.0  | (2.4, 29.7) |
| <i>LMO3</i> expression (high vs. low)  | 26 vs. 74 | 0.021     | 2.7  | (1.2, 6.3)  |
| <i>MYCN</i> (amplified vs. single)     | 17 vs. 83 | $< 0.001$ | 8.4  | (3.6, 19.5) |
| <i>LMO3</i> expression (high vs. low)  | 26 vs. 74 | 0.213     | 1.7  | (0.7, 4.1)  |
| Origin (non-adrenal vs. adrenal)       | 47 vs. 53 | 0.003     | 3.6  | (1.5, 9.9)  |
| <i>LMO3</i> expression (high vs. low)  | 26 vs. 74 | 0.021     | 2.6  | (1.2, 5.8)  |
| <i>Mash1</i> expression (high vs. low) | 30 vs. 70 | 0.022     | 2.6  | (1.1, 5.7)  |
| <i>LMO3</i> expression (high vs. low)  | 26 vs. 74 | 0.006     | 3.4  | (1.4, 7.8)  |

Footnotes; n: number of samples, H.R.: hazard ratio, C.I.: confidence interval.
